# Supplementary material for: Raman image-activated cell sorting
Source: PubMed Central journal article supplement (PMC7351993; doi:10.1038/s41467-020-17285-3), 2020-07-10
Supplement: 41467_2020_17285_MOESM3_ESM.pdf [file 41467_2020_17285_MOESM3_ESM.pdf]

**Title:** Supplementary Movie 1

**Description: Raman image-activated sorting of polymer particles.** The movie of flowing polymer particles with a throughput of about 50 eps was obtained by the high-speed CMOS camera (V1211, Vision Research Inc., NJ, USA).
